# Supplementary material
Source: publisher figshare collection journal article supplement (https://acs.figshare.com/ndownloader/files/26181065)
Supplement: Supplementary file 1 [file 26181065]

## Electronic Supplementary Information (ESI) for

# Insights into the reactive and deactivation mechanisms of manganese oxides for the ozone elimination: the roles of surface oxygen species

Lei Zhang,<sup>a,b</sup> Sheng Wang,<sup>\*,a</sup> Lirong Lv,<sup>a,b</sup> Ya Ding,<sup>a,b</sup> Dongxu Tian,<sup>c</sup>  
Shudong Wang<sup>a</sup>

<sup>a</sup>*Dalian National Laboratory for Clean Energy, Dalian Institute of Chemical Physics,  
Chinese Academy of Sciences, Dalian, 116023, PR China*

<sup>b</sup>*University of Chinese Academy of Sciences, Beijing, 100049, PR China*

<sup>c</sup>*School of Chemical Engineering, Dalian University of Technology, Dalian 116024,  
China*

*\*Corresponding author: Phone: +86-411-8437-9332, fax: +86-411-8466-2365;*

E-mail: [wangsheng@dicp.ac.cn](mailto:wangsheng@dicp.ac.cn)

There are 8 pages including 6 figures in the supporting information.

## Contents

1. Details on the catalyst preparation
2. Details on the catalyst characterization

**Figure S1.** XRD patterns of the as-prepared  $\gamma$ -MnOOH

**Figure S2.** N<sub>2</sub> adsorption and desorption isotherms of the different MnO<sub>x</sub> catalysts (MnO<sub>2</sub>-H-200, MnO<sub>2</sub>, Mn<sub>2</sub>O<sub>3</sub> and Mn<sub>3</sub>O<sub>4</sub>)

**Figure S3.** (a) the top plane view of  $\beta$ -MnO<sub>2</sub> (110), (b) and (c) the sites of oxygen vacancy

**Figure S4.** (a) the top plane view of Mn<sub>2</sub>O<sub>3</sub> (211), (b) the sites of oxygen vacancy

**Figure S5.** (a) the top plane view of Mn<sub>3</sub>O<sub>4</sub> (200), (b) the sites of oxygen vacancy

**Figure S6.** FT-IR spectra of MnO<sub>2</sub>-H-200, MnO<sub>2</sub>-H-200-0.6 and MnO<sub>2</sub>-H-200-0.2.

**Figure S7.** Ozone conversion over MnO<sub>2</sub>-H-200 and the regenerated MnO<sub>2</sub>-H-200

**Figure S8.** The pore size distribution for different MnO<sub>x</sub> catalysts (MnO<sub>2</sub>-H-200, MnO<sub>2</sub>, Mn<sub>2</sub>O<sub>3</sub> and Mn<sub>3</sub>O<sub>4</sub>) calculated by BJH method

**Table S1.** Surface Area and pore size distribution of MnO<sub>2</sub>, Mn<sub>2</sub>O<sub>3</sub> and Mn<sub>3</sub>O<sub>4</sub>

## 1. Details on the catalyst preparation

**Chemicals and reagents:**  $\text{Mn}(\text{CH}_3\text{COO})_2 \cdot 4\text{H}_2\text{O}$  was purchased from Sinopharm Chemical Reagent Co., Ltd. (Shanghai, China). NaOH, 30%  $\text{H}_2\text{O}_2$  and absolute ethanol was purchased from Kermel (Tianjin, China). All chemicals were analytical grade and used without further purification.

**Preparation of  $\gamma$ -MnOOH:** The pristine  $\gamma$ -MnOOH nanorod was synthesized by a redox precipitation process. In a typical synthesis, 6.127g  $\text{Mn}(\text{CH}_3\text{COO})_2 \cdot 4\text{H}_2\text{O}$  was dissolved in deionized water. 20mL 30%  $\text{H}_2\text{O}_2$  was poured to 50mL of 1M NaOH aqueous solution, then the NaOH- $\text{H}_2\text{O}_2$  solution was slowly added to the above  $\text{Mn}(\text{CH}_3\text{COO})_2 \cdot 4\text{H}_2\text{O}$  aqueous solution under vigorous stirring. Finally, the as-obtained solution was stirred at 60°C for 12 h. A brown solid was obtained by hot filtration, which was washed with deionized water and absolute ethanol for several times, finally dried in a vacuum at 60°C for 12 h.

**Preparation of manganese oxides with different valances:** Typically,  $\beta$ - $\text{MnO}_2$  was prepared by calcining  $\gamma$ -MnOOH precursors at 350°C for 4 h in air. When the temperature reached to 600°C,  $\alpha$ - $\text{Mn}_2\text{O}_3$  was obtained. And  $\text{Mn}_3\text{O}_4$  could be prepared via treating  $\gamma$ -MnOOH at 600°C for 2 h in Ar. A certain amount of  $\text{MnO}_2$  was treated at 200°C for 2h under a 10 vol%  $\text{H}_2$ /Ar gas flow, which was denoted as  $\text{MnO}_2$ -H-200.

## 2. Details on the catalyst characterization

The crystalline structure was characterized by X-ray diffraction (PANalytical Empyrean-100,  $\text{CuK}\alpha=1.54056 \text{ \AA}$ ). The morphology of the samples was observed by a JSM-7800F field emission scanning electron microscopy with an accelerating voltage

of 3 kV. And the transmission electron microscopy was done on a JEM-2000. The Raman spectra were recorded on a microscopic confocal Raman spectrometer (Bruker Optics Senterra). X-ray photoelectron spectroscopy was measured in an ESCALAB 250Xi spectrometer and the binding energy was calibrated with the signal for adventitious carbon at 284.6 eV. The specific surface areas were determined by N<sub>2</sub>-adsorption isotherms using a NOVA2200e instrument. All samples were pretreated at 150°C for 3h under high vacuum. BET specific surface area was calculated by the BET method according to the adsorption branch in the relative pressure range from 0.05 to 0.35.

Programmed temperature reduction or desorption experiments (TPR or TPD) were carried out using Quantachrome ChemiBET 3000 adsorption instrument equipped with a TCD detector. In H<sub>2</sub>-TPR experiment, 20 mg samples were loaded in a quartz reactor, pretreated at 200°C for 2h under He gas flow, and cooled to 25°C, following which the samples were heated to 700°C with a 10 vol% H<sub>2</sub>/Ar gas flow at a heat rate of 10°C min<sup>-1</sup>. In O<sub>2</sub>-TPD experiment, 50mg samples were pretreated at 200°C for 2h under He gas flow, and then cooled to 25°C. Afterwards, the samples were purged with a mixture of 3 vol% O<sub>2</sub>/He at 25°C for 2h. Desorption of O<sub>2</sub> was carried out from 25°C to 900°C at a heating rate of 5°C min<sup>-1</sup> purged with He. In O<sub>3</sub>-TPD experiment after ozone adsorption, 50mg catalysts were pretreated and cooled as described in the above O<sub>2</sub>-TPD experiment. Then the pretreated and cooled catalysts were kept at 30°C for a certain time with 1vol.% O<sub>3</sub>/O<sub>2</sub>. Then the resulting samples were further heated to 600°C under a He gas flow at a heating rate of 5°C min<sup>-1</sup>.

Fouriertransforminfrared spectra (FT-IR) were recorded by Thermal Nicolet 6700 spectroscopy and the scanning range was 650-4000  $\text{cm}^{-1}$ . The resolution was of 2  $\text{cm}^{-1}$ . KBr was added to dilute the sample.

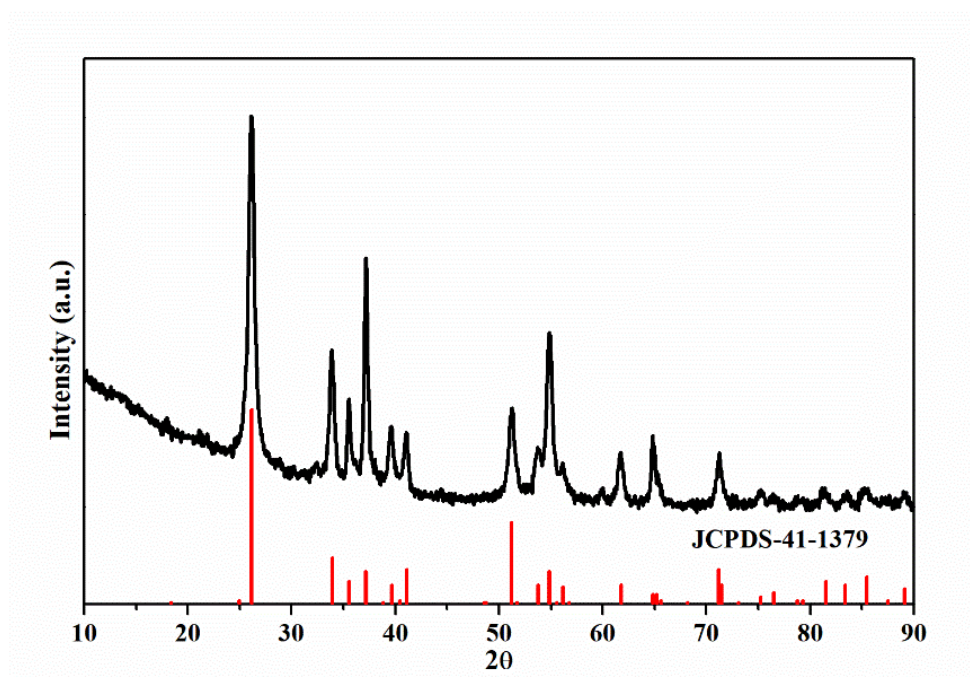

**Figure S1.** XRD patterns of the as-prepared  $\gamma$ -MnOOH

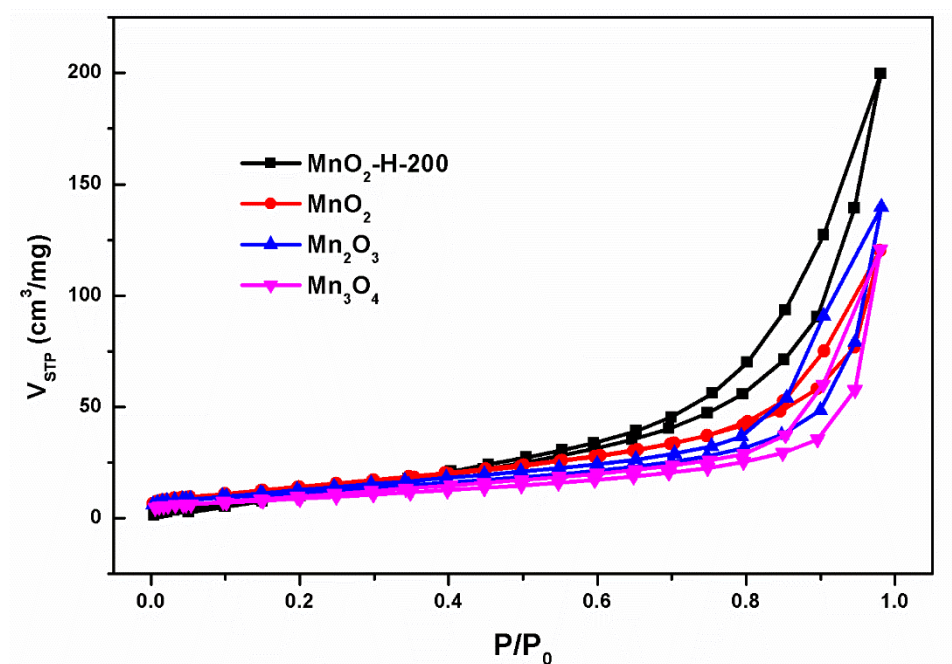

**Figure S2.** N<sub>2</sub> adsorption and desorption isotherms of the different MnO<sub>x</sub> catalysts (MnO<sub>2</sub>-H-200, MnO<sub>2</sub>, Mn<sub>2</sub>O<sub>3</sub> and Mn<sub>3</sub>O<sub>4</sub>)

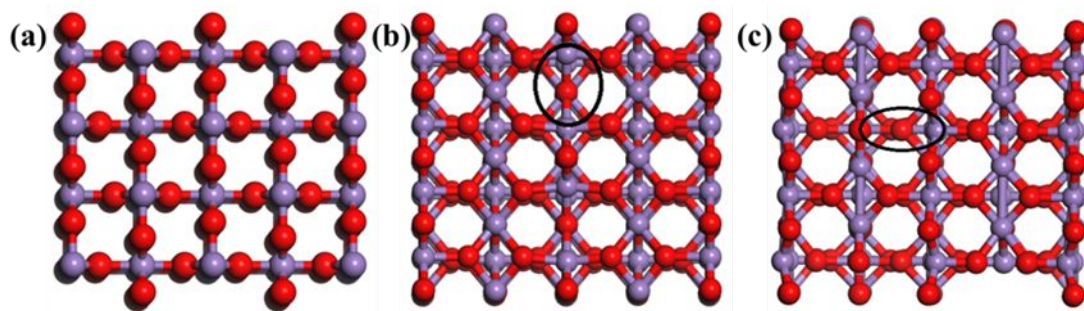

**Figure S3.** (a) the top plane view of  $\beta$ -MnO<sub>2</sub> (110), (b) and (c) the sites of oxygen vacancy

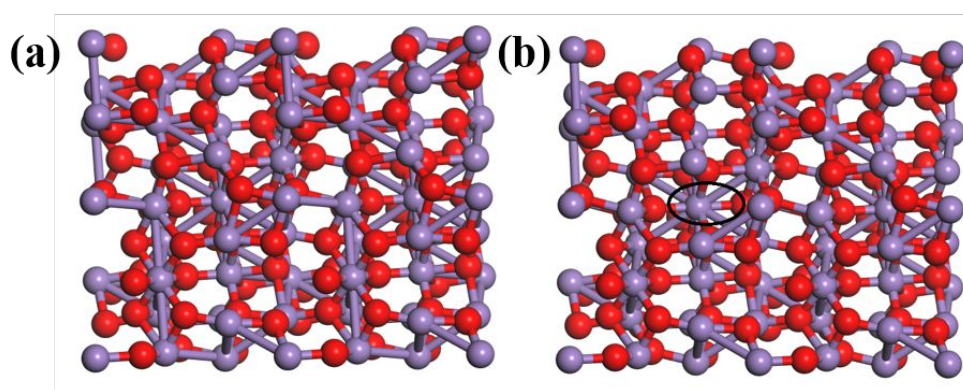

**Figure S4.** (a) the top plane view of Mn<sub>2</sub>O<sub>3</sub> (211), (b) the sites of oxygen vacancy

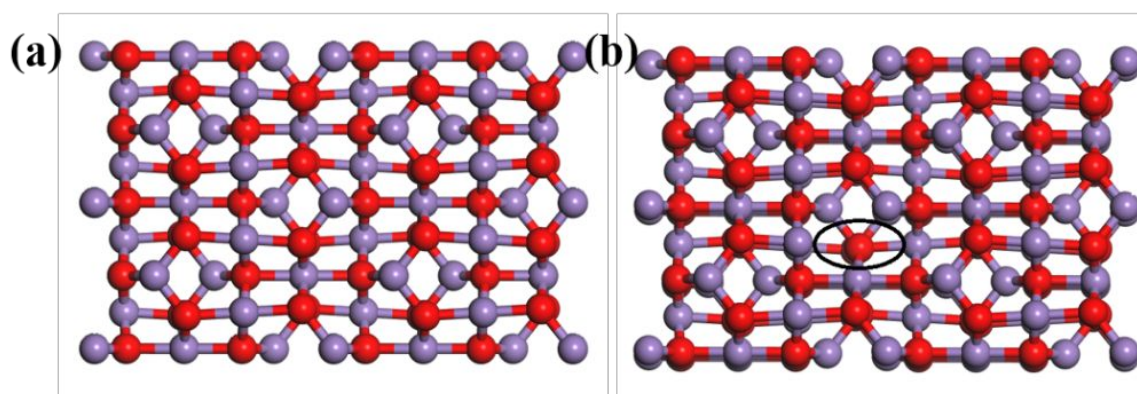

**Figure S5.** (a) the top plane view of Mn<sub>3</sub>O<sub>4</sub> (200), (b) the sites of oxygen vacancy

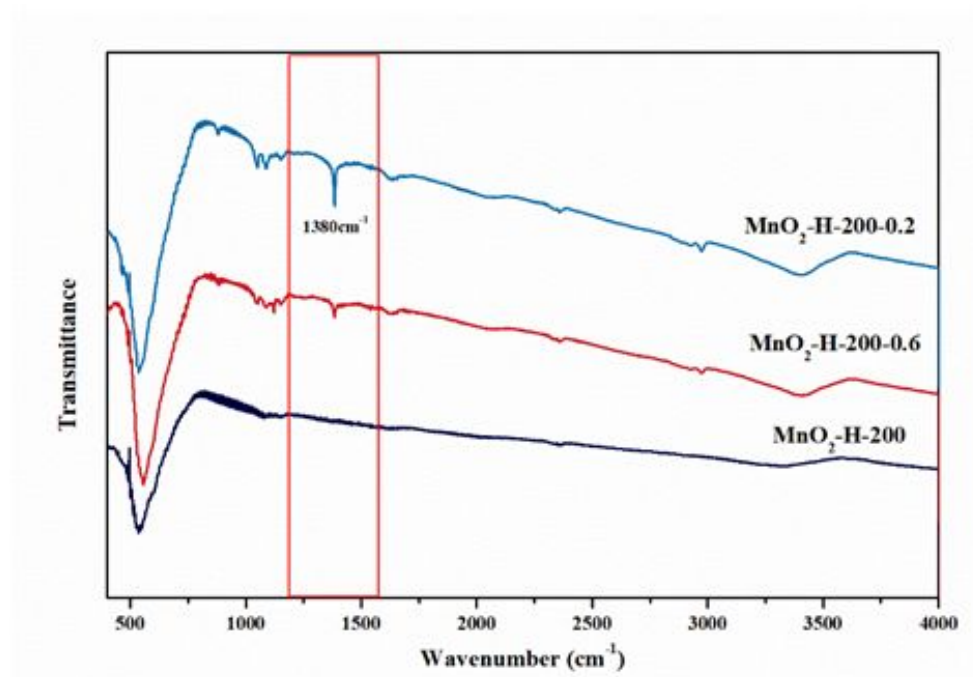

**Figure S6.** FT-IR spectra of MnO<sub>2</sub>-H-200, MnO<sub>2</sub>-H-200-0.6 and MnO<sub>2</sub>-H-200-0.2.

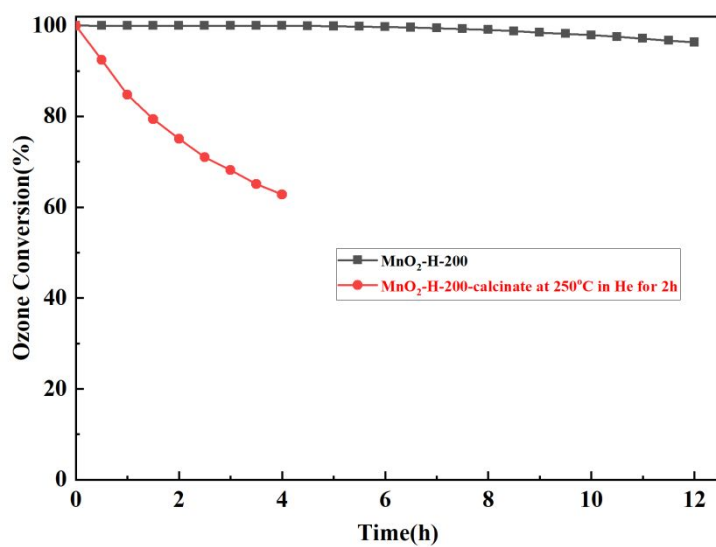

**Figure S7.** Ozone conversion over MnO<sub>2</sub>-H-200 and the regenerated MnO<sub>2</sub>-H-200



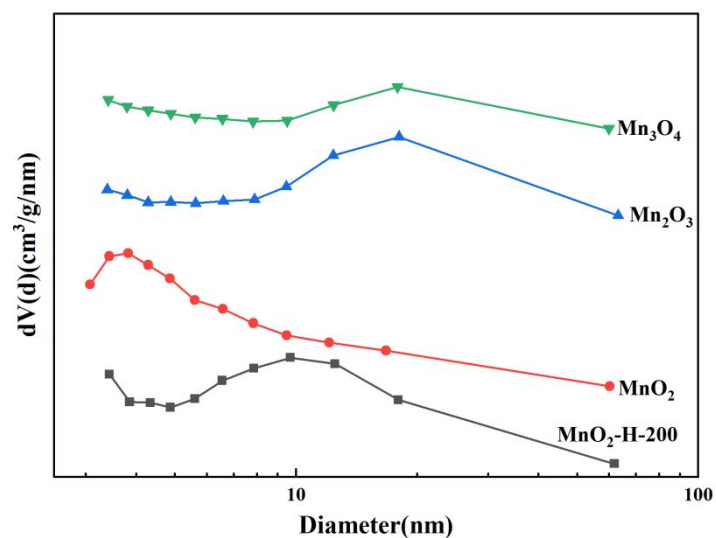

**Figure S8.** The pore size distribution for different  $\text{MnO}_x$  catalysts ( $\text{MnO}_2\text{-H-200}$ ,  $\text{MnO}_2$ ,  $\text{Mn}_2\text{O}_3$  and  $\text{Mn}_3\text{O}_4$ ) calculated by BJH method

**Table S1** Surface Area and pore size distribution of  $\text{MnO}_2$ ,  $\text{Mn}_2\text{O}_3$  and  $\text{Mn}_3\text{O}_4$

|                         | Surface Area<br>( $\text{m}^2/\text{g}$ ) | Pore Volume<br>( $\text{cm}^3/\text{g}$ ) | Pore Diameter<br>(nm) |
|-------------------------|-------------------------------------------|-------------------------------------------|-----------------------|
| $\text{MnO}_2$          | 54.4                                      | 0.180                                     | 3.4                   |
| $\text{Mn}_2\text{O}_3$ | 43.8                                      | 0.214                                     | 18.0                  |
| $\text{Mn}_3\text{O}_4$ | 34.8                                      | 0.183                                     | 18.9                  |
